# Supplementary material
Source: publisher figshare collection journal article supplement (https://acs.figshare.com/ndownloader/files/9112867)
Supplement: Supplementary file 1 [file 9112867]

*Supporting information for:*

High Morphological Order in a Nearly Precise Acid-Containing Polymer and Ionomer

Edward B. Trigg,<sup>†</sup> Brandon J. Tiegs,<sup>‡,§</sup> Geoffrey W. Coates,<sup>‡</sup> Karen I. Winey\*,<sup>†</sup>

<sup>†</sup>Department of Materials Science and Engineering, University of Pennsylvania, Philadelphia, Pennsylvania 19104, United States.

<sup>‡</sup>Department of Chemistry and Chemical Biology, Baker Laboratory, Cornell University, Ithaca, New York 14853-1301, United States

<sup>§</sup>BJT Present address: Boulder Scientific Company, 4161 Specialty Place

## Experimental Methods

**Materials.** The syntheses of all polymers were reported previously. 11/12SAnh was synthesized via step polymerization of succinic anhydride-alcohol monomers.<sup>1</sup> The precise polymers p9AA and p15AA were synthesized via acyclic diene (ADMET) polymerization of symmetric diene monomers.<sup>2</sup> The pseudorandom copolymer r15AA was synthesized via ring-opening metathesis copolymerization of cyclooctene and 2-(4-cyclooctenyl)acetic acid.<sup>2</sup> The 9 and 15 in p9AA and p15AA refer to the number of backbone carbon atoms in each repeating unit. In 11/12SAnh, the repeating unit can contain either 11 or 12 backbone carbon atoms. In r15AA, the overall chemical composition is identical to p15AA but the architecture is pseudorandom.

Neutralization of 11/12SAnh was accomplished by adding a warm (70–90°C) solution of sodium acetate (345 mg dissolved in 350 mL of 20 v/v% 1,4-dioxane in 1-butanol at 90°C over 3 hours) to a warm (50°C) solution of the polymer (1 gram dissolved in 20 mL of 33 v/v% 1,4-dioxane in 1-butanol) over 20 minutes. The neutralized polymer precipitated out of solution during the addition. After decanting 1,4-dioxane/1-butanol, the precipitated polymer was washed with 2 x 10 mL of 1-butanol, scraped from the flask, and dried overnight under vacuum at ambient temperature. The neutralization procedure for p9AA, p15AA, and r15AA utilized sodium acetate and was reported previously.<sup>3</sup> To determine neutralization level, elemental analysis was performed by Galbraith Laboratories (Knoxville, TN) using elemental analyzers for C, H, O, and Na. The error in the reported neutralization percentage is approximately  $\pm 3\%$ . The neutralization percentage as determined by elemental analysis is included in the naming scheme (43Na means 43% of COOH groups are neutralized with sodium).

**FTIR.** Attenuated total reflectance Fourier-transform infrared spectroscopy (ATR-FTIR) was carried out on a Nicolet 6700 (Thermo Fisher) spectrometer using the GATR accessory (Harrick) with a resolution of  $2\text{ cm}^{-1}$ . Curves were normalized by the absorbance of the CH bending mode at  $1466\text{ cm}^{-1}$ . Being a viscous fluid, 11/12SAnh was simply applied onto the Ge crystal with a spatula. 11/12SAnh-43Na was hot-pressed onto a stainless steel AFM disc (Ted Pella, Inc. 16218) at 50°C, and this film was pressed onto the Ge crystal with the AFM disc acting as a support.

**X-ray Scattering.** The un-neutralized 11/12SAnh was applied onto a 20  $\mu\text{m}$  thick sheet of mica using a spatula. The neutralized sample 11/12SAnh-43Na was hot-pressed at 50°C into a film of thickness 400 $\mu\text{m}$  and no substrate was used. X-ray scattering was performed at room temperature at the Multi-Angle X-ray Scattering (MAXS) facility at the University of Pennsylvania, with a Cu K $\alpha$  source and a sample-to-detector distance of 11 cm. Details of the setup can be found in ref 4. Data reduction and analysis was performed using the Datasqueeze software.<sup>5</sup> Low-q peaks were fit with a Lorentzian peak shape and a linear background. The instrumental broadening, estimated from the line widths of silver behenate, was less than 0.04  $\text{\AA}^{-1}$  FWHM.

**DSC.** Samples for DSC were dried for at least 12 hours under vacuum, and were loaded into hermetic pans. DSC was performed using a Q2000 (TA Instruments).  $T_g$  was obtained from the point of inflection upon cooling at a rate of 10°C/min.

## References

1. Tiegs, B. J. Ring-Expanding Carbonylation of Epoxides: Applications in the Synthesis of Polyesters, Pharmaceuticals, and Fine Chemical Building Blocks. Ph.D. Dissertation, Cornell University, 2016.
2. Baughman, T. W.; Chan, C. D.; Winey, K. I.; Wagener, K. B., Synthesis and Morphology of Well-Defined Poly(ethylene-co-acrylic acid) Copolymers. *Macromolecules* **2007**, *40*, 6564-6571.
3. Buitrago, C. F.; Bolintineanu, D. S.; Seitz, M. E.; Oppen, K. L.; Wagener, K. B.; Stevens, M. J.; Frischknecht, A. L.; Winey, K. I., Direct Comparisons of X-ray Scattering and Atomistic Molecular Dynamics Simulations for Precise Acid Copolymers and Ionomers. *Macromolecules* **2015**, *48*, 1210-1220.
4. Buitrago, C. F.; Alam, T. M.; Oppen, K. L.; Aitken, B. S.; Wagener, K. B.; Winey, K. I., Morphological Trends in Precise Acid- and Ion-Containing Polyethylenes at Elevated Temperature. *Macromolecules* **2013**, *46*, 8995-9002.
5. Heiney, P., Datasqueeze Software. *Commun. Powder Diff. Newsl.* **2005**, *32*, 9-11.
